# Supplementary material
Source: Elsevier journal article supplement (https://www.sciencedirect.com/science/article/pii/S0214158220300451)
Supplement: mmc1 [file S0214158220300451:mmc1.pdf]

## **DIAGNOSTICO Y TRATAMIENTO LOCORREGIONAL DE LAS PACIENTES CON CANCER DE MAMA DURANTE LA PANDEMIA DE LA COVID-19**

**Título abreviado:** Tratamiento locorregional del cancer de mama durante la pandemia por COVID-19

Ricardo Pardo<sup>1\*</sup>, Manel Algara<sup>2</sup>, María Angeles Montero-Fernández<sup>3</sup>, Xavier Sanz<sup>2</sup>, Mar Vernet<sup>4</sup>, Nuria Rodríguez<sup>2</sup>, Rogelio Andrés-Luna<sup>5</sup>, Antoni Piñero<sup>6</sup>, R. Ciérvide<sup>7</sup>, Raúl Córdoba<sup>8</sup>, Ángel Montero<sup>6</sup>, Irene Osorio<sup>1</sup>, Nuria Argudo<sup>4</sup>, Sergio Salido<sup>1</sup>, Susan Pritchard<sup>3</sup>, Juan Bernar<sup>1</sup>, Dave Rajiv<sup>9</sup>, Natalia Frade Alves<sup>4</sup>, Pau Nicolau<sup>4</sup>, Pilar Orihuela<sup>1</sup> y Marta Jiménez<sup>4</sup>

<sup>1</sup>Unidad de Mama. Servicio de Cirugía General. Hospital Universitario Fundación Jimenez Díaz. Madrid.

<sup>2</sup> Oncología Radioterápica. Hospital del Mar. Barcelona.

<sup>3</sup>Manchester University NHS Foundation Trust. Histopathology Department

<sup>4</sup>Unidad de Mama. Hospital del Mar. Barcelona

<sup>5</sup>Unidad de Mama. Hospital Santa María. Lisboa

<sup>6</sup>Unidad de Mama. Hospital Universitario Virgen de la Arrixaca. Murcia

<sup>7</sup>Oncología Radioterápica. Hospital HM Sanchinarro. Madrid.

<sup>8</sup>Unidad Innovación Clínica y Organizativa (UICO), Hospitales Públicos Quironsalud, Madrid.

<sup>9</sup>Manchester University NHS Foundation trust. Breast Unit Nightingale Centre

\*Correo electrónico: [rpardo133@yahoo.es](mailto:rpardo133@yahoo.es)

## **Resumen**

Nos enfrentamos a una pandemia que afecta a una parte importante de la población. A finales de abril de 2020, en el mundo hay cerca de 3.000.000 de casos, con 205.000 muertes y 860.000 pacientes recuperados

La respuesta a esta pandemia en muchos casos ha supuesto modificaciones importantes en el cuidado diario de las pacientes con cáncer, dependiendo el buen resultado en buena parte del ajuste de los protocolos a las circunstancias especiales y a los tratamientos multidisciplinarios

Presentamos una revisión del tratamiento quirúrgico y radioterapia junto con las recomendaciones de los autores basadas en su experiencia personal a la hora del diagnóstico y tratamiento locorregional del cáncer de mama durante la pandemia del COVID-19

Los comités multidisciplinarios deben seguir reuniéndose semanalmente en formato de videoconferencia. Todas las intervenciones quirúrgicas e irradiaciones deben ser llevadas a cabo con la máxima seguridad tanto para las pacientes como para el personal sanitario que participa. El hipofraccionamiento debe ser el tratamiento radioterápico estándar. En algunos casos se utilizará tratamiento sistémico primario o incluso radioterapia preoperatoria. Es esencial una coordinación importante entre los equipos quirúrgicos y los oncológicos, tanto radioterápicos como médicos.

**Palabras clave:** cáncer de mama, COVID-19, tratamiento locorregional, cirugía y radioterapia

## **DIAGNOSIS AND LOCOREGIONAL TREATMENT OF PATIENTS WITH BREAST CANCER DURING THE COVID-19 PANDEMIC**

### **Abstract**

We are facing a pandemic that is going to affect a significant part of the population. At the end of April in the world there are about 3,000,000 cases, with 205,000 deaths and 860,000 patients recovered.

The response to this pandemic has in many cases led to a significant change in the daily work of caring for cancer patients, the good results of which depend largely on time-adjusted protocols and multidisciplinary treatments.

We present a review of local, surgical and radiotherapy treatment together with authors' recommendations made from personal experience on ways to act in the diagnosis and surgical treatment of breast cancer during the COVID-19 pandemic.

The multidisciplinary Breast Committees must continue to meet weekly in videoconference format. All surgical actions and irradiations must be carried out with maximum safety for both the patients and the participating teams. Hypofractionation in radiation therapy should be the standard treatment. Sometimes it is recommended to apply a primary systemic treatment or even a primary irradiation. Great coordination between the surgical and oncology teams, both medical and radiotherapeutic, is essential.

**Keywords:** breast cancer, COVID-19, surgical and radiotherapy treatment

## INTRODUCCION

Actualmente nos enfrentamos a una pandemia que afecta a una parte importante de la población mundial. A finales de abril de 2020, en el mundo hay cerca de 3.000.000 de casos, con 205.000 muertes y 860.000 pacientes recuperados, por un proceso epidémico cuyo inicio fue en la ciudad de Wuhan en diciembre de 2019, y se reconoció como pandemia por la OMS el 11 de marzo de 2020, ocasionada por la infección del virus SARS-CoV2.

Hasta un 10% de los pacientes hospitalizados precisan ingreso en las Unidades de Cuidados Intensivos y los hospitales se han tenido que reorganizar para dar cabida a toda la demanda creada. El 30.8% de la mortalidad corresponde a mujeres con una edad mayor que los varones fallecidos ( 82 años frente a los 78 de los varones) (1)

Durante semanas, y tras la aparición de la COVID-19, a los especialistas que nos ocupamos del tratamiento quirúrgico, oncológico médico y oncológico radioterápico del cáncer de mama se nos han planteado múltiples problemas relacionados con el diagnóstico y el tratamiento de nuestras pacientes.

Los pacientes con cáncer tienen el doble de posibilidades de contraer la COVID-19 que el resto de la población (2) y, en caso de contagiarse, tienen un pronóstico peor que los pacientes que pasan la enfermedad sin este antecedente, atendiendo al número de ingresos en UCI, la necesidad de ventilación mecánica o la mortalidad asociada (3)

La respuesta a esta pandemia ha supuesto, en muchos casos, una importante modificación del trabajo diario de cuidado a las pacientes con cáncer, cuyos buenos resultados dependen en gran medida de la correcta aplicación de protocolos interdisciplinarios, de diagnóstico y tratamiento, ajustados en el tiempo. (4)

Hay hospitales en los que, afortunadamente, las Unidades de Mama no han precisado tomar ninguna medida específica, al funcionar como unidades independientes, en edificios sin pacientes con COVID. En este sentido, cada Hospital se ha adaptado según sus circunstancias, pero la carencia de recursos, la falta de quirófanos programados (respiradores dedicados a Reanimación y UCI por COVID) y la de falta de personal, por estar afectado y de baja por la enfermedad, en las Unidades de Mama es una realidad con la que nos estamos enfrentando con una duración que todavía parece indefinida.

Se deben seguir reuniendo los Comités de Mama multidisciplinares semanalmente, de manera presencial, con restricciones en cuanto a su número de participantes por especialidad y respetando las normas generales de distanciamiento y del uso de medidas de protección, o mediante el formato de videoconferencia, algo accesible en el momento actual prácticamente desde todos los centros.

Presentamos una revisión del tratamiento locorregional, quirúrgico y radioterápico, junto con recomendaciones de los autores, realizadas desde la experiencia personal, sobre las formas de actuar en el diagnóstico y tratamiento quirúrgico del cáncer de mama durante la pandemia de la COVID-19, y acorde a otras propuestas en el ámbito internacional (5)

## **DIAGNÓSTICO DEL CÁNCER DE MAMA**

Se debe intentar realizar solo visitas presenciales en las **primeras consultas** de los casos de pacientes con sospecha de cáncer de mama, así como a las que presentan un diagnóstico de malignidad ya establecido, para informarlas y ponerlas en lista de espera o aplicar tratamiento neoadyuvante.

Al resto de las pacientes que deberían acudir a recoger los resultados de procesos no malignos, se les debe informar de los resultados vía telefónica, solicitando a la vez una

cita presencial posterior para discutir los resultados y evaluar posteriores revisiones. Nos encontramos con muchos pacientes que no quieren venir al Hospital a las consultas por miedo a contagiarse.

Las pacientes **mayores y frágiles**, especialmente si están en residencias, remitidas por tumoraciones palpables, **no deben ser evaluadas** hasta que la situación epidémica lo aconseje. Los pacientes **mayores de 70 con comorbilidad** tampoco deben acudir al Hospital. Independientemente de lo anterior, no se debe permitir la entrada de acompañantes en las consultas.

Es importante minimizar el contagio. En la actualidad, los especialistas pasan las consultas con mascarilla quirúrgica intentando mantener las distancias de seguridad de, al menos, un metro y medio. Si se requiere una exploración física siempre se realizará con mascarilla y guantes seguida, al terminar, de lavado de manos con agua y jabón, o solución hidroalcohólica antiséptica, durante un mínimo de 20 segundos. En todo momento se deben tomar las medidas adecuadas para no contagiarse ni contagiar al resto de personal que interviene en la asistencia a estas pacientes.

En caso de resultados no concluyentes como de proceso benigno y se precisasen estudios complementarios, estos se solicitan telemáticamente y se les cita para informar del resultado.

Con todo lo anterior se trata de intentar evitar en lo posible la asistencia física citándose exclusivamente a las pacientes para recoger el resultado definitivo, firmar el consentimiento informado y ponerla en la lista de espera o pautarle tratamiento según proceda, de manera que la población este circulando lo menos posible.

Con el fin utilizar correctamente los recursos y mantener la seguridad de las pacientes y el personal sanitario, **los programas de detección precoz y las consultas de genética deben retrasarse** hasta el final de la pandemia 11. (6)

Se debe evitar en lo posible el retraso diagnóstico en pacientes con clínica o sintomatología sospechosa de cáncer, así como en los pacientes con hallazgos radiológicos BIRADS 5 (alta prioridad) o BIRADS 4 (prioridad media) (7)

En la situación actual, y en el momento de realizar la biopsia con aguja gruesa es recomendable la colocación un clip en todas las biopsias sospechosas de ser un cáncer, independientemente de que sean palpables o no, con el fin de evitar la repetición del procedimiento una vez se disponga del diagnóstico anatomopatológico (8)

Dentro del proceso diagnóstico se debe evitar en lo posible la realización de RM, salvo en caso de necesidad en personas no infectadas, dada la dificultad de desinfección del equipo (9)

## **TRATAMIENTO LOCORREGIONAL: CIRUGÍA**

### **QUIRÓFANO**

Cada hospital, sistema sanitario y cirujano o ginecólogo, tendrá que revisar su actividad para organizar, posponer o cancelar las cirugías programadas o procedimientos invasivos.

Se recomienda la realización de PCR para detección de la COVID-19 a cada paciente que vaya a ser intervenido en las 48 horas antes de la cirugía, así como garantizar un equipo quirúrgico completo (anestelistas, enfermeras, auxiliares, celadores y cirujanos) sin posibilidades de contagiar a la paciente. Si la PCR es positiva la cirugía deberá ser diferida y solo deberá realizarse una vez que la paciente se haya negativizado.

En caso de ser positiva se repetirá una nueva PCR a las 72 horas de la anterior, y así sucesivamente hasta que sea negativa

Creemos que es innecesario someter a las pacientes a una cirugía que se puede diferir, salvo excepciones. Las pacientes sometidas a cirugía o quimioterapia tienen más posibilidades de presentar infecciones graves respecto a las que no reciben tratamiento.

Dada la sobrecarga y la carencia de recursos que sufren algunos hospitales, sobre todo en relación a quirófanos dotados correctamente y la disminución de personal sanitario para realizar las intervenciones, se deben tomar decisiones complicadas, ya no solo en el aspecto clínico, sino por sus connotaciones éticas, sobre qué pacientes operar y cuáles diferir, teniendo siempre en cuenta que uno de los grandes desafíos es organizarse sin saber cuando va a terminar la pandemia.

Algo que hay que tener muy en cuenta de cara a la organización de los tratamientos es que el retraso de 60 días en intervenciones quirúrgicas de cáncer de mama en estadios I y II no están asociados con un peor resultado pronóstico desde el punto de vista de los resultados oncológicos (10).

## **Normas para la cirugía según la fase de afectación por COVID-19**

### **FASE I**

**Con pocos pacientes COVID-19 ingresados en el Hospital y sin repercusión en los recursos.**

La cirugía debería estar restringida a pacientes con supervivencia comprometida si la cirugía no es realizada en los tres meses siguientes:

- Neoadyuvancias con el tratamiento terminado
- T2 o N1 ER+/PR+HER2-
- Triple negativo o HER2 positivo



- Discordancia Rx patológica
- Recidivas
- Las mastectomías profilácticas, mastectomías de reducción de riesgo y patología benigna deben diferirse un mínimo de 3 meses
- La segunda parte de la reconstrucción en dos tiempos debe ser diferida un mínimo de tres meses
- Para los tumores triple negativo/HER2+ invasivo, los pacientes con T1N0M0 deben ser considerados de **alta prioridad** quirúrgica. Se podría dar neoadyuvancia en T1 en el límite alto del tamaño o por decisión del Comité de Patología Mamaria

- Después de quimioterapia neoadyuvante

#### 1. Carcinoma invasivo con receptor hormonal positivo

- Si ha tenido una respuesta parcial o completa se puede continuar con la HT para **retrasar la cirugía 4-8 semanas**. Habría que llamar a las pacientes cada **dos semanas** para ver si existe progresión.
- Si la paciente es ER+ y HER2+ se puede añadir tratamiento endocrino al tratamiento anti HER2 para retrasar la cirugía 4-8 semanas llamando a las pacientes cada mes para detectar progresiones de la enfermedad

#### 2. Triple negativo/HER2+ invasivo: Retrasar 4-8 semanas la posibilidad de cirugía que tiene que ser con carácter prioritario una vez normalizada la situación.

La cirugía de reconstrucción con tejido autólogo debería ser diferida, **en lo posible** hasta la resolución de la pandemia, así como la mastectomía con reconstrucción inmediata. Si hay que realizar una reconstrucción inmediata se debe realizar de la forma menos agresiva posible con prótesis directa o expansor y cirugía en dos tiempos (9)

Se deberá realizar el máximo posible de técnicas de cirugía conservadora.

#### **Casos que se pueden diferir:**

- Escisión de lesiones benignas
- Biopsias con discordancia Rx-Pat supuestamente benignas
- Lesiones de alto riesgo (atipias, papilomas...)
- Cirugía profiláctica en pacientes con y sin cancer
- BGC diferida tras carcinoma infiltrante identificado en biopsia escisional
- cTisN0 ER positivo y negativo

1. Los CDIS con RE+ pueden ser tratados con HT (Tamoxifeno o Inhibidores de la Aromatasa) con seguimiento telefónico cada 4 semanas para evaluar crecimiento
2. Los CDIS con ER-. Los de pequeño tamaño, sin sospechas radiológicas de infiltración, se pueden seguir sin poner tratamiento con control telefónico cada 4 semanas para evaluar crecimiento
3. Los CDIS de gran volumen, ER -, de alto grado o palpables pueden ser retrasados con un seguimiento estricto del Comité de Mama con seguimiento telefónico cada 4 semanas atentos a la aparición de nuevas masas o telorragia. Estos pacientes serían de alta prioridad quirúrgica en cuanto la situación fuera segura

- Ampliación de márgenes
- Tumores que están respondiendo a tratamiento neoadyuvante

- T1N0 ER +, RP+ /Her2 negativo
- Carcinoma inflamatorio y localmente avanzado

**Tratamientos alternativos que deben de ser considerados (si lo permite la utilización de recursos):**

- Tumores estadio T1N0 ER+ PR+ /Her2 – pueden recibir tratamiento hormonal
- Tumores TN y HER2 + pueden recibir tratamiento neoadyuvante
- Tumores estadio T2 o N1 ER+/PR+/HER2- pueden recibir tratamiento hormonal
- Carcinomas inflamatorios y enfermedad localmente avanzada deberían recibir tratamiento neoadyuvante

## **FASE II**

**Con muchos pacientes COVID-19 ingresados en el Hospital, UCI limitada como la capacidad de realizar ventilación mecánica y/o quirófanos limitados**

La cirugía se debería restringir a pacientes en los que la supervivencia se podría ver comprometida si la cirugía no se realiza en los siguientes días:

**Casos que necesitan hacerse lo antes posible**

- Drenaje de abscesos mamarios
- Drenaje de hematomas
- Revisión de un colgajo isquémico
- Revascularización de un colgajo

La reconstrucción con tejido autólogo debe diferirse

**SE DEBEN RETRASAR TODAS LAS CIRUGIAS DE MAMA**

- Se recomiendan tratamientos alternativos siempre que existan los medios disponibles
- Utilizar neoadyuvancia en los casos posibles
- Vigilancia periódica del resto de los casos

### **FASE III**

#### **TODOS los medios dedicados a la COVID-19, sin posibilidad de ventilación mecánica ni UCI, y/o sin quirófanos**

La cirugía solo se debería realizar en casos en los que la supervivencia de la paciente se podría comprometer si no se realiza en horas:

- Drenaje de abscesos mamarios
- Drenaje de hematomas
- Revisión de un colgajo isquémico
- Revascularización de un colgajo (11)

#### **CIRUGIAS URGENTES QUE SE DEBEN DE REALIZAR EN TODOS LOS CASOS**

- Enfermedad progresiva en tratamiento sistémico
- Angiosarcomas
- Phyllodes malignos

### **TRATAMIENTO LOCORREGIONAL: RADIOTERAPIA**

La pandemia secundaria a la COVID-19 comporta dos problemas fundamentales en los servicios de oncología radioterápica. El primero es la necesidad de minimizar la exposición de las pacientes a COVID-19 sin comprometer el resultado oncológico, ya que los pacientes oncológicos tienen un riesgo aumentado de sufrir complicaciones

graves en caso de padecer una infección por SARS-Cov-2. El segundo es secundario al bloqueo del sistema sanitario, la práctica totalidad de los recursos se están dedicando a controlar la pandemia, por lo que, las intervenciones se están retrasando, con lo que muchas pacientes que se deberían estar tratando se están acumulando y acudirán en dos o tres meses; al tratarse de neoplasia de mama, este hecho es especialmente importante ya que representan el 30% de todos los pacientes de un servicio de oncología radioterápica (12).

Por tanto, debemos tener previstas unas medidas durante la pandemia y la post-pandemia. Las sociedades europeas, ESTRO (13) y la americana ASTRO plantean diferentes estrategias que van desde retrasar la irradiación, favorecer la omisión de la misma en algunos casos muy seleccionados, al empleo de esquemas de irradiación ultracortos o incluso irradiación preoperatoria.

### **Omitir la irradiación**

Las guías internacionales proponen en aquellos casos de pacientes mayores de 70 años, con un tumor inferior a 20 mm, Grado I, sin signos de mal pronóstico local (ausencia de infiltración angio-linfática y perineural), márgenes quirúrgicos no afectados, ausencia de afectación ganglionar, receptores estrogénicos y de progesterona positivos, HER 2 no amplificado y KI 67 bajo, valorar la omisión de la irradiación de acuerdo con la paciente, ya que debe asumir un mayor riesgo de recidiva local, siempre y cuando reciba tratamiento antiestrogénico (14).

Igualmente, podría considerarse la omisión de radioterapia en aquellas mujeres diagnosticadas de carcinoma intraductal de bajo o muy bajo riesgo, incluyendo aquellas con tumores no palpables diagnosticados por pruebas de imagen tan solo, menores de 25 mm, de grado 1 ó 2 y extirpados con márgenes libres. No obstante, especial precaución

debe tomarse con las pacientes de menos de 40 años de edad por su mayor riesgo de recidiva (15).

### **Retrasar la irradiación**

En aquellas pacientes ya intervenidas que acuden al servicio de oncología radioterápica durante la pandemia, se valorará retrasar la irradiación hasta un máximo de 12 semanas tras la cirugía.

### **Irradiación con esquemas hipofraccionados (15-16 sesiones)**

A pesar de que existen importantes variaciones (16) la utilización del hipofraccionamiento es estándar (17,18) en muchos centros españoles, por lo que debe ser considerado como la primera elección (19) en cualquier caso de neoplasia de mama, incluyendo tras mastectomía, en caso de irradiación ganglionar (20) o incluso tras reconstrucción inmediata.

Lo mismo ocurre con la sobreimpresión, se aconseja hacerla de forma hipofraccionada (21) o incluso de forma integrada con el hipofraccionamiento y hacer el tratamiento completo en 15 sesiones

### **Irradiación con esquemas ultracortos (5-7 sesiones)**

El Grupo Español de Oncología Radioterápica de Mama (GEORM), recomienda adelantar la implantación de los esquemas ultracortos y no omitir la irradiación en ninguna paciente en la que esté indicada.

*Irradiación de toda la mama/áreas ganglionares:*

Así este grupo ha elaborado el protocolo RHEMA que está basado en los resultados de los estudios UK FAST Trial (22,23) , UK FAST-FORWARD Trial (24,25)

y HAI-5 (26). Básicamente consiste en administrar una dosis de 26 Gy en mama con un esquema de 5 fracciones diarias de 5,2 Gy y 29 Gy en lecho tumoral de forma concomitante a dosis de 5,8 Gy diarias. Este esquema se propone inicialmente para pacientes con tumores Tis-T3 N0, aunque también podría considerarse la irradiación de los ganglios con estos esquemas. Hay que destacar que la utilización de estos esquemas ultracortos exige la utilización de técnicas especiales de alta conformación que pueden incluir la IMRT o VMAT así como sistemas de IGRT (radioterapia guiada por la imagen) que permiten la verificación de posicionamiento diario antes de cada sesión.

#### *Irradiación parcial de la mama:*

En casos seleccionados de acuerdo a los criterios definidos por los grupos cooperativos de GEC-ESTRO y ABS-ASTRO (edad superior a 50 años, tumor inferior a 3 cm, márgenes quirúrgicos no afectados, no afectación ganglionar, GI-II, perfil luminal A, puede considerarse la realización de irradiación parcial de la mama bien mediante radioterapia intraoperatoria en el momento de la tumorectomía/cuadrantectomía o bien mediante radioterapia externa (27,28) administrando dosis de 30 Gy en 5 fracciones diarias de 6 Gy o con esquemas bifraccionados (29), sobre lecho tumoral con margen. La braquiterapia también es una alternativa terapéutica útil, aunque en el periodo de la pandemia esta técnica no está operativa en todos los centros.

#### **Irradiación preoperatoria**

El retraso en la intervención quirúrgica derivado de la crisis actual puede provocar que se retrase el tratamiento local en pacientes en las que este tratamiento sea muy importante en el control de la enfermedad. Algunos grupos han propuesto administrar hormonoterapia de manera neoadyuvante hasta poder realizar la cirugía. Aun siendo muy

interesante esta aproximación, el poder complementarla administrando un tratamiento local no invasivo, pero eficaz, como es la radioterapia emerge como una alternativa interesante en base a la evidencia publicada. La irradiación preoperatoria (30,31) se asocia con una tasa no despreciable de respuestas patológicas que permiten retrasar la cirugía, incluso, mejorar el pronóstico de las pacientes al tiempo que permite y facilita su combinación témporo-espacial con el tratamiento sistémico. GEORM también ha elaborado el protocolo RAPOCAMA de irradiación preoperatoria.

Básicamente consiste en la administración de 40,5 Gy en fracciones de 2,7 Gy en mama con sobreimpresión concomitante en el tumor de 54 Gy a 3,6 Gy día. Este esquema puede administrarse de forma concomitante a los taxanos, a las terapias anti HER o al tratamiento hormonal. No se debe concomitar con antraciclinas, en este caso se recomienda iniciar el tratamiento con la radioterapia y los taxanos seguida de las antraciclinas. En casos seleccionados, el esquema puede acortarse a la administración de 26 Gy en mama en 5 fracciones diarias de 2,6 Gy y sobreimpresión concomitante en tumor de 29-30 Gy en fracciones de 5,7-5,8 Gy concurrentemente al tratamiento hormonal. Esta alternativa preoperatoria permite retrasar la cirugía al menos 20 semanas.

Finalmente, para las pacientes de mayor edad (32), a las que probablemente no se indicará cirugía, se propone el esquema hipofraccionado de una fracción semanal de 6,5 Gy durante 5 semanas hasta una dosis total de 32,5 Gy, pudiendo administrar una sobreimpresión de 2 fracciones de 6,5 Gy. En este caso si se quieren incluir los ganglios, éstos se irradiarán con fracciones de 5,5 Gy hasta una dosis total de 27,5 Gy.

## CONCLUSIONES

Todas las Unidades de Mama se enfrentan a situaciones completamente nuevas y nunca sospechadas durante la pandemia. En este momento, los protocolos se deben



adaptar a las circunstancias cambiantes, poniendo como prioridad la seguridad de unas pacientes que, aparte del confinamiento, tienen que afrontar tardar más tiempo del habitual en operarse, con la consiguiente ansiedad que ello genera.

Se deben seguir reuniendo los Comités de Mama multidisciplinares semanalmente, aconsejándose el formato de videoconferencia, algo accesible en el momento actual prácticamente desde todos los centros con las múltiples plataformas disponibles.

Es muy importante que todas las actuaciones quirúrgicas y radioterápicas se realicen con la máxima seguridad, tanto para las pacientes como para los equipos asistenciales que participen.

Muchas Unidades se verán obligadas a adoptar nuevas medidas para el manejo y el tratamiento del cáncer de mama. Se desconoce actualmente el impacto de estas medidas en las pacientes y nuestro deber profesional pasa por intentar minimizar, en todo lo posible, el daño que esta situación pueda originarles y sacar las consecuencias positivas que puedan aparecer, especialmente, en lo que se refiere a la experiencia adquirida ante potenciales nuevos brotes futuros de la pandemia.

Durante la pandemia se ha reforzado la importancia de la presencia de líderes de cada especialidad locales y nacionales que sepan reorganizar los servicios con la máxima seguridad y efectividad.

Además de reforzar el carácter multi e interdisciplinar del diagnóstico y tratamiento del cáncer de mama, esta situación ha mostrado imprescindible una perfecta coordinación entre los Servicios Quirúrgicos (Cirugía General, Ginecología y Cirugía Plástica), Oncología Médica y Oncología Radioterápica, en especial en lo que al tratamiento locorregional del mismo se refiere.

De cara al futuro se abre una interesante línea de investigación en la que la opinión de las pacientes sobre la forma en la que han vivido todo este proceso, tanto los PREMS (Patient Reported Experience Measure) como los PROMS (Patient Reported Outcome Measure) pasará a ser determinante de cara a actuaciones futuras

Asimismo y a modo de corolario, hay dos preguntas que nuestros trabajos en marcha tendrán que resolver: si volverán alguna vez las cosas a ser como fueron y si las modificaciones que estamos aplicando ahora pasarán a ser lo que se considere normal en el futuro.

## **BIBLIOGRAFIA**

- 1.- Liang W, Guan W, Chen R et al. Cancer patients in SARS-CoV-2 infection: A nationwide analysis in China. *Lancet Oncol* 2020;21:335-337
- 2.- Yu J, Ouyang W, Chua MLK et al. SARS-CoV-2 transmission in cancer patients of a tertiary hospital in Wuhan. medRxiv, 2020 (Preprint )
- 3.- Liang W, Guan W, Chen R et al. SARS-CoV-2 Transmission in Patients With Cancer at a Tertiary Care Hospital in Wuhan, China *JAMA Oncol.* 2020 Mar 25. doi: 10.1001/jamaoncol.2020.0980. [Epub ahead of print]
- 4.- Ueda M, Martins R, Hendrie P, et al. Managing Cancer Care During COVID-19 Pandemic: Agility and Collaboration Toward a Common Goal. *J Natl Compr Canc Netw.* 2020;18(4)
- 5.- Curigliano G, Cardoso MJ, Poortmans P, Gentilini O, Pravettoni G, Mazzocco K, Houssami N, Pagani O, Senkus E, Cardoso F, editorial Board of The Breast. Recommendations for triage, prioritization and treatment of breast cancer patients during the COVID-19 pandemic. *Breast* 2020 <https://doi.org/10.1016/j.breast.2020.04.006>

- 6.- ASBrS, ACR. ASBrS and ACR Joint Statement on Breast Screening Exams During the COVID-19 Pandemic. 2020)
- 7.- ASCO. Care of Individuals with Cancer During COVID-19. 2020;  
<https://www.asco.org/asco-coronavirus-information/care-individuals-cancer-during-covid-19>
- 8.- <https://associationofbreastsurgery.org.uk/media/252009/abs-statement-150320-v2.pdf>
- 9.- Mathelin C, Nisand I Breast cancer management during the COVID 19 pandemic: the CNGOF takes action. Gynecol Obstet Fertil Senol. 2020 Apr 19. pii: S2468-7189(20)30163-X. doi: 10.1016/j.gofs.2020.04.008.
- 10.- Mansfield SA, Abdel-Rasoul M, Terrando AM et al. Timing of breast cancer surgery-how much does it matter? Breast J 2017;23:444.451
- 11:- (American College of Surgeons. COVID-19: Guidance for triage of non-emergent surgical procedures. Available at <https://www.facs.org/covid-19/clinical-guidance/elective-case/breast-cancer>. Accessed March 25,2020)
- 12.- Algara M, Sanz X, Foro P, Lacruz M, Reig A, Lozano J, Membrive I, Quera J, Rodríguez N. Use of radiation treatment units in breast cancer. Changes in last 15 years. Clin Transl Oncol 2008; 10:47-51.
- 13.- CE Coles, C Aristei, J Bliss, L Boersma, AM Brunt, S Chatterjee, G Hanna, R Jagsi, O Kaidar Person, A. Kirby, I Mjaaland, I Meattini, A Montero Luis, GN Marta, B Offersen, P. Poortmans , S. Rivera. International Guidelines on Radiation Therapy for Breast Cancer During the COVID-19 Pandemic. Clinical Oncology 32 (2020) 279e281
- 14.- Kunkler IH, Williams LJ, Jack WJ, Cameron DA, Dixon JM; PRIME II investigators. Breast-conserving surgery with or without irradiationin women aged 65 years or older

with early breast cancer (PRIME II): a randomised controlled trial. *Lancet Oncol.* 2015 Mar;16(3):266-73. doi: 10.1016/S1470-2045(14)71221-5.

15.- Lior Z. Braunstein, Erin F. Gillespie, Linda Hong, Amy Xu, Samuel F. Bakhoun, John Cuaron, Boris Mueller, Beryl McCormick, Oren Cahlon, Simon Powell, Atif J. Khan, Breast radiotherapy under COVID-19 pandemic resource constraints -- approaches to defer or shorten treatment from a Comprehensive Cancer Center in the United States, *Advances in Radiation Oncology* 2020, <https://doi.org/10.1016/j.adro.2020.03.013>.

16.- Prades J, Algara M, Espinàs JA, Farrús B, Arenas M, Reyes V, García-Reglero V, Cambra MJ, Rubio E, Anglada L, Eraso A, Pedro A, Fuentes-Raspall MJ, Tuset V, Solà J, Borràs JM. Understanding variations in the use of hypofractionated radiotherapy and its specific indications for breast cancer: A mixed-methods study. *Radiother Oncol.* 2017 Apr;123(1):22-28.

17.- Whelan TJ, Pignol JP, Levine MN, Julian JA, MacKenzie R, Parpia S, Shelley W, Grimard L, Bowen J, Lukka H, Perera F, Fyles A, Schneider K, Gulavita S, Freeman C. Long-term results of hypofractionated radiation therapy for breast cancer. *N Engl J Med.* 2010 Feb 11;362(6):513-20.

18.- Haviland JS, Owen JR, Dewar JA, Agrawal RK, Barrett J, Barrett-Lee PJ, Dobbs HJ, Hopwood P, Lawton PA, Magee BJ, Mills J, Simmons S, Sydenham MA, Venables K, Bliss JM, Yarnold JR; START Trialists' Group. The UK standardisation of breast radiotherapy (START) trials of radiotherapy hypofractionation for treatment of early breast cancer: 10-year follow-up results of two randomised controlled trials. *Lancet Oncol.* 2013 Oct;14(11):1086-1094

19.- Montero A, Sanz X, Hernanz R, Cabrera D, Arenas M, Bayo E, Moreno F, Algara M. Accelerated hypofractionated breast radiotherapy: FAQs (Frequently Asked Questions) and facts. *Breast*, 23(4):299-309.

- 20.- Leong N, Truong PT, Tankel K, Kwan W, Weir L, Olivotto IA. Hypofractionated nodal radiation therapy was not associated with increased patient-reported arm or brachial plexopathy symptoms. *Int J Radiat Oncol Biol Phys*. 2017 Dec 1;99(5):1166-1172
- 21.- Sanz J, Rodríguez N, Foro P, Dengra J, Reig A, Pérez P, Membrive I, Ortiz A, Codinach M, Algara M. Hypofractionated boost after whole breast irradiation in breast carcinoma: chronic toxicity results and cosmesis. *Clin Transl Oncol*. 2017 Apr;19(4):464-469.
- 22.- Brunt AM, Haviland J, Sydenham M, Algurafi H, Alhasso A, Bliss P, Bloomfield D, Emson M, Goodman A, Harnett A. FAST Phase III RCT of Radiotherapy Hypofractionation for Treatment of Early Breast Cancer: 10-Year Results (CRUKE/04/015). *IJROBP* (2018) 102 (5): 1603-1604.
- 23.- Van Hulle H, Naudts D, Deschepper E, Vakaet V, Paelinck L, Post G, Van Greveling A, Speleers B, Deseyne P, Lievens Y, De Neve W, Veldeman L, Monten C. Accelerating adjuvant breast irradiation in women over 65 years: Matched case analysis comparing a 5-fractions schedule with 15 fractions in early and locally advanced breast cancer. *J Geriatr Oncol*. 2019 Nov;10(6):987-989. doi: 10.1016/j.jgo.2019.04.007.
- 24.- Brunt AM, Haviland JS, Sydenham MA, Alhasso A, Bloomfield D, Chan C, Churn M, Cleator S, Coles CE, Emson M, Goodman A, Griffin C, Harnett A, Hopwood P, Kirby A, Kirwan C, Morris C, Sawyer E, Somaiah N, Syndikus I, Wilcox M, Wheatley D, Zotova R, Bliss JM, Yarnold JR. OC-0595: FAST-Forward phase 3 RCT of 1-week hypofractionated breast radiotherapy: 3-year normal tissue effects. *Radiotherapy and Oncology* Volume 127, Supplement 1, April 2018, S311-S312.
- 25.- Brunt AM, Wheatley D, Yarnold J, et al. Acute skin toxicity associated with a 1-week schedule of whole breast radiotherapy compared with a standard 3-week regimen

delivered in the UK FAST-Forward Trial. *Radiother Oncol.* 2016;120(1):114–118.  
doi:10.1016/j.radonc.2016.02.027

26.- Monten C, Lievens Y, Olteanu LAM, Paelinck L, Speleers B, Deseyne P, Van Den Broecke R, De Neve W, Veldeman L. Highly Accelerated Irradiation in 5 Fractions (HAI-5): Feasibility in Elderly Women With Early or Locally Advanced Breast Cancer. *Int J Radiat Oncol Biol Phys.* 2017 Jul 15;98(4):922-930. doi: 10.1016/j.ijrobp.2017.01.229.

27.- Coles CE, Griffin CL, Kirby AM, Titley J, Agrawal RK, Alhasso A, Bhattacharya IS, Brunt AM, Ciurlionis L, Chan C, Donovan EM, Emson MA, Harnett AN, Haviland JS, Hopwood P, Jefford ML, Kaggwa R, Sawyer EJ, Syndikus I, Tsang YM, Wheatley DA, Wilcox M, Yarnold JR, Bliss JM; IMPORT Trialists. Partial-breast radiotherapy after breast conservation surgery for patients with early breast cancer (UK IMPORT LOW trial): 5-year results from a multicentre, randomised, controlled, phase 3, non-inferiority trial. *Lancet.* 2017 Sep 9;390(10099):1048-1060.

28.- Livi L, Meattini I, Marrazzo L, Simontacchi G, Pallotta S, Saieva C, Paiar F, Scotti V, De Luca Cardillo C, Bastiani P, Orzalesi L, Casella D, Sanchez L, Nori J, Fambrini M, Bianchi S. Accelerated partial breast irradiation using intensity-modulated radiotherapy versus whole breast irradiation: 5-year survival analysis of a phase 3 randomised controlled trial. *Eur J Cancer.* 2015 Mar;51(4):451-63.

29.- Rodríguez N, Sanz X, Dengra J, Foro P, Membrive I, Reig A, Quera J, Fernández-Velilla E, Pera O, Lio J, Lozano J, Algara M. Five-Year Outcomes, Cosmesis, and Toxicity With 3-Dimensional Conformal External Beam Radiation Therapy to Deliver Accelerated Partial Breast Irradiation. *Int J Radiat Oncol Biol Phys* 2013; 87(5):1051-7.

30.- Lightowlers SV, Boersma LJ, Fourquet A, Kirova YM, Offersen BV, Poortmans P, Scholten AN, Somaiah N, Coles CE. Preoperative breast radiation therapy: Indications and perspectives. *Eur J Cancer.* 2017 Sep;82:184-192.

31.- First results of the preoperative accelerated partial breast irradiation (PAPBI) trial. van der Leij F, Bosma SC, van de Vijver MJ, Wesseling J, Vreeswijk S, Rivera S, Bourgier C, Garbay JR, Foukakis T, Lekberg T, van den Bongard DH, van Vliet-Vroegindewey C, Bartelink H, Rutgers EJ, Elkhuisen PH. First results of the post-operative accelerated partial breast irradiation (PAPBI) trial. *Radiother Oncol*. 2015 Mar;114(3):322-7.

32.- Sanz X, Zhao M, Rodriguez N, Granado R, Foro P, Reig A, Membrive I, Algara M. Once-weekly hypofractionated radiotherapy for breast cancer in elderly patients: efficacy and tolerance in 486 patients. *BioMed Reserch International*. 2018(2018); article on line ID8321871.
